# Supplementary material for: Transcription-associated topoisomerase 2α (TOP2A) activity is a major effector of cytotoxicity induced by G-quadruplex ligands
Source: eLife journal article supplement (doi:10.7554/elife.65184), 2021-06-28

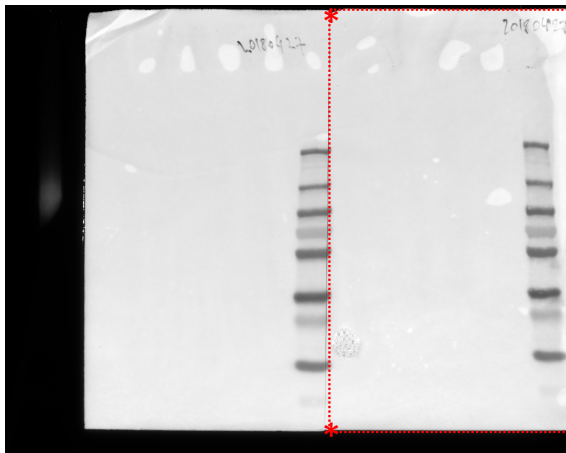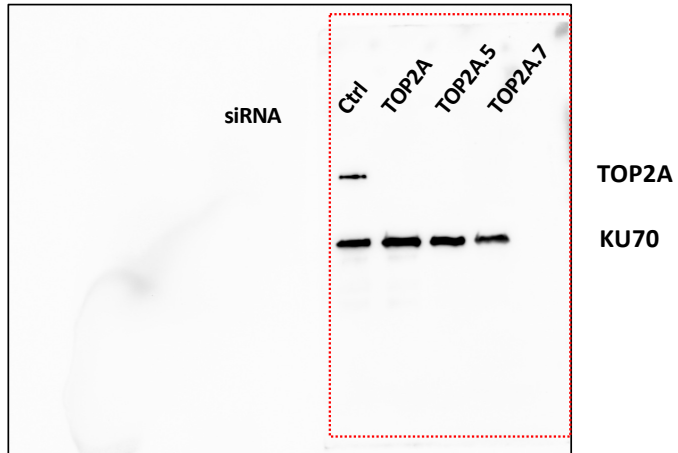

Supplement: fig3-figsupp1-data1 [file elife-65184-fig3-figsupp1-data1-v2.pdf]
